# Supplementary material
Source: PubMed Central journal article supplement (PMC5001147)
Supplement: DC160429SupplementaryData.pdf [file DC160429SupplementaryData.pdf]

SUPPLEMENTARY DATA

**Supplementary Table 1. Age-specific and age-standardized all-cause mortality (per 1000 person-years) in the total IGT cohort and the NGT comparison group**

| Age group         | 25-59   |      | 60-69   |      | 70-up  |      | All ages  |      | Age Standardized rate |
|-------------------|---------|------|---------|------|--------|------|-----------|------|-----------------------|
|                   | n/pyrs  | Rate | n/pyrs  | Rate | n/pyrs | Rate | n/pyr     | Rate |                       |
| <b>IGT group</b>  | 47/7294 | 6.4  | 65/2750 | 23.6 | 62/907 | 68.4 | 174/10951 | 15.9 | 15.9                  |
| <b>NGT group*</b> | 26/7066 | 3.7  | 33/2655 | 12.4 | 41/902 | 45.5 | 100/10623 | 9.4  | 9.3 <sup>†</sup>      |

\* Included 519 people (282 men and 237 women) who had participated in the diabetes screening and had the 75g OGTT but with NGT, defined as 2-hour plasma glucose level <6.7 mmol

† Rate for normal glucose tolerance (NGT ) group is standardized to impaired glucose tolerance (IGT) group

SUPPLEMENTARY DATA

**Supplementary Table 2. Death rates (/1000 person-years) before and after the onset of diabetes in women\***

| Age group                                    | 25-59  |      | 60-69  |      | 70-up |       | All ages |      | Age-standardized Rate <sup>†</sup> |
|----------------------------------------------|--------|------|--------|------|-------|-------|----------|------|------------------------------------|
|                                              | n/pyr  | Rate | n/pyr  | Rate | n/pyr | Rate  | n/pyr    | Rate |                                    |
| <b>Time before onset of diabetes (years)</b> |        |      |        |      |       |       |          |      |                                    |
| <b>0-5</b>                                   | 1/976  | 1.0  | 4/48   | 83.3 | 0/9   | 0.0   | 5/1033   | 4.8  | 20.0                               |
| <b>5-10</b>                                  | 1/527  | 1.9  | 1/29   | 34.5 | 0/11  | 0.0   | 2/567    | 3.5  | 9.5                                |
| <b>10-15</b>                                 | 0/327  | 0.0  | 0/47   | 0.0  | 1/8   | 125.0 | 1/382    | 2.6  | 5.5                                |
| <b>15-up</b>                                 | 0/215  | 0.0  | 1/136  | 7.4  | 2/11  | 181.8 | 3/362    | 8.3  | 9.6                                |
| <b>Total</b>                                 | 2/2045 | 1.0  | 6/260  | 23.1 | 3/39  | 76.9  | 11/2344  | 4.7  | 9.3                                |
| <b>Diabetes duration (years)</b>             |        |      |        |      |       |       |          |      |                                    |
| <b>0-5</b>                                   | 3/765  | 3.9  | 5/168  | 30.0 | 2/15  | 133.3 | 10/948   | 10.5 | 15.3                               |
| <b>5-10</b>                                  | 2/547  | 3.7  | 4/246  | 16.3 | 1/21  | 47.6  | 7/814    | 8.6  | 8.4                                |
| <b>10-15</b>                                 | 2/298  | 6.7  | 6/291  | 20.6 | 2/53  | 37.7  | 10/642   | 15.6 | 11.2                               |
| <b>15-up</b>                                 | 1/114  | 8.8  | 5/230  | 21.7 | 3/87  | 34.5  | 9/431    | 20.9 | 12.8                               |
| <b>Total</b>                                 | 8/1724 | 4.6  | 20/935 | 21.4 | 8/176 | 45.5  | 36/2835  | 12.7 | 10.2                               |

\* time-dependent updated age and duration groups

† Age-standardized to distribution of person-years in the total IGT group of women

SUPPLEMENTARY DATA

**Supplementary Table 3. Death rates (/1000 person-years) before and after the onset of diabetes in men\***

| Age group                                    | 25-59   |      | 60-69  |      | 70-up  |      | All ages |      | Age-standardized Rate <sup>†</sup> |
|----------------------------------------------|---------|------|--------|------|--------|------|----------|------|------------------------------------|
|                                              | n/pyr   | Rate | n/pyr  | Rate | n/pyr  | Rate | n/pyr    | Rate |                                    |
| <b>Time before onset of diabetes (years)</b> |         |      |        |      |        |      |          |      |                                    |
| <b>0-5</b>                                   | 7/1072  | 6.5  | 3/150  | 20.0 | 1/16   | 62.5 | 11/1238  | 8.9  | 16.9                               |
| <b>5-10</b>                                  | 6/478   | 12.6 | 2/198  | 10.1 | 1/20   | 50.0 | 9/696    | 12.9 | 16.4                               |
| <b>10-15</b>                                 | 0/243   | 0.0  | 0/172  | 0.0  | 3/60   | 50.0 | 3/475    | 6.3  | 6.0                                |
| <b>15-up</b>                                 | 1/186   | 5.4  | 2/125  | 16.0 | 7/124  | 56.5 | 10/435   | 23.0 | 14.4                               |
| <b>Total</b>                                 | 14/1979 | 7.1  | 7/645  | 10.9 | 12/220 | 54.5 | 33/2844  | 11.6 | 13.8                               |
| <b>Diabetes duration (years)</b>             |         |      |        |      |        |      |          |      |                                    |
| <b>0-5</b>                                   | 5/670   | 7.5  | 13/273 | 47.6 | 7/110  | 63.9 | 25/1053  | 23.7 | 25.1                               |
| <b>5-10</b>                                  | 10/438  | 22.8 | 8/300  | 26.7 | 11/119 | 92.4 | 29/857   | 33.8 | 32.3                               |
| <b>10-15</b>                                 | 5/280   | 17.8 | 5/199  | 25.1 | 12/129 | 93.4 | 22/608   | 36.2 | 28.8                               |
| <b>15-up</b>                                 | 3/154   | 19.5 | 6/139  | 43.1 | 9/117  | 76.9 | 18/410   | 43.9 | 32.8                               |
| <b>Total</b>                                 | 23/1542 | 14.9 | 32/911 | 35.1 | 39/475 | 82.1 | 94/2928  | 32.1 | 28.5                               |

\* time-dependent updated age and duration groups

† Age-standardized to distribution of person-years in the total IGT group of men

SUPPLEMENTARY DATA

**Supplementary Table 4. Age-sex adjusted causes of death before and after progressing to diabetes<sup>†</sup>**

| Causes of death        | Deaths before onset of diabetes |                                           | Deaths after onset of diabetes |                                           |
|------------------------|---------------------------------|-------------------------------------------|--------------------------------|-------------------------------------------|
|                        | N (%)                           | Age-sex adjusted rate /1000 pyrs (95% CI) | N (%)                          | Age-sex adjusted Rate /1000 pyrs (95% CI) |
| CVD                    | 20 (45.5)                       | 3.6 (2.3-5.7)                             | 58 (44.6)                      | 6.9 (5.0-9.6)                             |
| Coronary heart disease | 6 (13.6%)                       | 1.0 (0.4-2.3)                             | 27 (20.8%)                     | 2.2 (1.2-4.0)                             |
| Stroke                 | 14 (31.8%)                      | 2.4 (1.4-4.2)                             | 31 (23.9%)                     | 4.3 (2.8-6.5)                             |
| Non-CVD                | 24 (54.5)                       | 4.3 (2.8-6.5)                             | 72 (55.4)                      | 9.2 (6.9-12.2)                            |
| Cancer                 | 15 (34.1%)                      | 2.7 (1.6-4.7)                             | 30 (23.1%)                     | 3.6 (2.3-5.6)                             |
| Renal failure          | 0                               | 0.0                                       | 8 (6.2%)                       | 1.5 (0.7-3.1)                             |
| Infection              | 3 (6.8%)                        | 0.4 (0.1-1.4)                             | 14 (10.8%)                     | 1.2 (0.5-2.7)                             |
| COPD                   | 1 (2.3%)                        | 0.08 (0.008-0.8)                          | 5 (3.9%)                       | 0.1 (0.02-0.9)                            |
| Diabetes-related*      | 1 (2.3%)                        | 0.2 (0.03-1.3)                            | 5 (3.9%)                       | 0.5 (0.1-1.8)                             |
| Other                  | 4 (9.1%)                        | 0.4 (0.1-1.3)                             | 10 (7.7%)                      | 1.7 (0.8-3.4)                             |
| All causes             | 44 (100%)                       | 7.9 (5.7-10.7)                            | 130 (100%)                     | 16.7 (13.6-20.3)                          |

CVD=cardiovascular disease, CHD=coronary heart disease, COPD=chronic obstructive pulmonary disease, Other—including cirrhosis, injury, crohn’s disease and unknown cause;

<sup>†</sup> Age-sex standardized to distribution of person-years in the total IGT group;

\* death from ketoacidosis or hyperosmolar coma.
